# Supplementary material for: Seasonal Single-Site Sampling Reveals Large Diversity of Marine Algal Toxins in Coastal Waters and Shellfish of New Caledonia (Southwestern Pacific)
Source: MDPI journal article supplement (doi:10.3390/toxins15110642), 2023-11-03
Supplement: s1 [file s1]

## Supplementary Materials

# Seasonal Single-Site Sampling Reveals Large Diversity of Marine Algal Toxins in Coastal Waters and Shellfish of New Caledonia (Southwestern Pacific)

Manoëlla Sibat, Tepoerau Mai, Simon Tanniou, Isabelle Biegala, Philipp Hess and Thierry Jauffrais

**Table S1.** Average amount (mean  $\pm$  standard deviation,  $n = 3$ ) with coefficient of variation (CV %) of toxin accumulated by SPATT bag during the two seasons after one week of exposure in Lemon Bay, Noumea.

| Season      | Toxicity in ng SPATT <sup>-1</sup> |               |               |                |                |
|-------------|------------------------------------|---------------|---------------|----------------|----------------|
|             | PTX2                               | AZA2          | PnTx-G        | OA             | hYTX           |
| <i>Cold</i> | 3.0 $\pm$ 0.5                      | 0.3 $\pm$ 0.1 | 0.6 $\pm$ 0.0 | 37.3 $\pm$ 4.2 | 12.6 $\pm$ 1.4 |
|             | 19%                                | 17%           | 4%            | 11%            | 11%            |
| <i>Warm</i> | 51.6 $\pm$ 10.1                    | 0.6 $\pm$ 0.2 | 3.5 $\pm$ 0.7 | 37.2 $\pm$ 2.4 | 16.4 $\pm$ 2.6 |
|             | 20%                                | 28%           | 21%           | 7%             | 16%            |

**Table S2.** Quantitative results of the LC-MS/MS analysis obtained on the whole tissue of the shellfish collected in the bays of Noumea.

| Sample Code | Toxicity in $\mu\text{g kg}^{-1}$ of WT |            |           |                 |      |        |      |       |        |      |
|-------------|-----------------------------------------|------------|-----------|-----------------|------|--------|------|-------|--------|------|
|             | hYTX                                    | h45-OH-YTX | hCOOH-YTX | OA              | PTX2 | PTX2sa | AZA2 | GYM-A | PnTX-G | BTX3 |
| WT N°1      | 6                                       | 1.8        | 1.5       | ND <sup>1</sup> | ND   | ND     | 0.5  | 1     | 3.7    | 2.9  |
| WT N°2      | ND                                      | ND         | ND        | ND              | ND   | ND     | ND   | 2.3   | 8.3    | ND   |
| WT N°3      | ND                                      | ND         | ND        | ND              | 2.7  | 2.7    | ND   | 1.3   | 1.0    | ND   |
| WT N°4      | 6.7                                     | ND         | 0.6       | 0.6             | 0.0  | 2.2    | 1.3  | 1.5   | 7.0    | ND   |
| WT N°5      | ND                                      | ND         | ND        | ND              | ND   | ND     | ND   | 8.0   | 16.0   | ND   |
| WT N°6      | ND                                      | ND         | 3.9       | 3.9             | ND   | ND     | ND   | 8.4   | 0.8    | ND   |
| WT N°7      | ND                                      | ND         | 6.2       | 6.2             | ND   | 2.6    | 0.2  | 0.7   | 22.6   | ND   |
| WT N°8      | 0.6                                     | ND         | ND        | ND              | ND   | ND     | ND   | 0.5   | 0.1    | ND   |
| WT N°9      | ND                                      | ND         | ND        | ND              | ND   | ND     | ND   | 7.8   | 2.8    | ND   |
| WT N°10     | ND                                      | ND         | ND        | ND              | ND   | ND     | ND   | 22.6  | 6.0    | ND   |

**Table S3.** List of the selected MRM transitions and the MS parameters used for the detection of lipophilic toxins in negative ionization mode (**method 1**) and in positive ionization mode (**method 2 and method 3**).

| Ionization mode  | Compound                   | Parent ion (m/z) | Fragment ion (m/z) | DP (V) | CE (eV) | CXP (eV) |
|------------------|----------------------------|------------------|--------------------|--------|---------|----------|
| ESI <sup>-</sup> | <i>OA &amp; DTX2</i>       | 803.4            | 113.1              | -170   | -92     | -9       |
|                  |                            |                  | 255.1*             |        | -62     | -16      |
|                  | <i>DTX1</i>                | 817.5            | 255.1*             | -170   | -68     | -13      |
|                  |                            |                  | 113.1              |        | -92     | -5       |
|                  | <i>YTX</i>                 | 1141.4           | 1061.6*            | -120   | -48     | -17      |
|                  |                            |                  | 855.6              |        | -98     | -19      |
|                  | <i>Homo-YTX</i>            | 1155.5           | 1075.6*            | -120   | -48     | -17      |
|                  |                            |                  | 869.4              |        | -98     | -19      |
|                  | <i>45-OH YTX</i>           | 1157.5           | 1077.5*            | -120   | -48     | -17      |
|                  |                            |                  | 855.5              |        | -98     | -19      |
|                  | <i>45-OH homo YTX</i>      | 1171.5           | 1091.5*            | -120   | -48     | -17      |
|                  |                            |                  | 869.4              |        | -98     | -19      |
|                  | <i>COOH YTX</i>            | 1173.5           | 1093.5*            | -120   | -48     | -17      |
|                  |                            |                  | 855.5              |        | -98     | -19      |
|                  | <i>Homo COOH YTX</i>       | 1187.5           | 1107.5*            | -120   | -48     | -17      |
|                  |                            |                  | 869.4              |        | -98     | -19      |
| ESI <sup>+</sup> | <i>Portimine</i>           | 402.5            | 246.5*             | 100    | 58      | 10       |
|                  |                            |                  | 134.1              |        | 69      | 8        |
|                  | <i>GYM-A</i>               | 508.4            | 490.2*             | 86     | 33      | 12       |
|                  |                            |                  | 162.4              |        | 69      | 10       |
|                  | <i>GYM-B/-C</i>            | 524.4            | 506.4*             | 86     | 33      | 12       |
|                  |                            |                  | 162.4              |        | 69      | 10       |
|                  | <i>SPX-A / SPX desMe-C</i> | 692.7            | 444.3              | 121    | 53      | 26       |
|                  | <i>SPX-A</i>               |                  | 150.0*             |        | 69      | 8        |
|                  | <i>SPX desMe-C</i>         |                  | 164.2*             |        | 69      | 8        |
|                  | <i>SPX-B / SPX desMe-D</i> | 694.3            | 444.3              | 121    | 53      | 26       |
|                  | <i>SPX-B</i>               |                  | 150.0*             |        | 69      | 8        |
|                  | <i>SPX desMe-D</i>         |                  | 164.2*             |        | 69      | 8        |
|                  | <i>PnTX-G</i>              | 694.4            | 440.2              | 125    | 60      | 10       |
|                  |                            |                  | 164.1*             |        | 80      | 8        |
|                  | <i>PnTX-A</i>              | 712.4            | 440.2              | 125    | 60      | 10       |
|                  |                            |                  | 164.1*             |        | 80      | 8        |
|                  | <i>PtTX-A /-B /-C</i>      | 831.5            | 458.5              | 125    | 60      | 10       |
|                  |                            |                  | 164.2*             |        | 80      | 8        |
|                  | <i>AZA 1</i>               | 842.6            | 824.6*             | 116    | 41      | 12       |
|                  |                            |                  | 672.3              |        | 69      | 16       |
|                  |                            |                  | 654.4              |        | 69      | 16       |
|                  | <i>AZA2</i>                | 856.6            | 838.6*             | 116    | 41      | 12       |
|                  |                            |                  | 672.4              |        | 69      | 16       |
|                  |                            |                  | 654.4              |        | 69      | 16       |
|                  | <i>AZA3</i>                | 828.6            | 792.6*             | 116    | 41      | 12       |
|                  |                            |                  | 658.4              |        | 69      | 16       |
|                  |                            |                  | 640.4              |        | 69      | 16       |
|                  | <i>PTX2</i>                | 876.6            | 823.3*             | 91     | 31      | 12       |
|                  |                            |                  | 805.6              |        | 37      | 12       |
|                  | <i>PTX2 sa</i>             | 894.6            | 823.5*             | 91     | 31      | 12       |

|                  |                 |       |        |     |    |    |
|------------------|-----------------|-------|--------|-----|----|----|
|                  |                 |       | 805.6  |     | 37 | 12 |
|                  | <i>PTX1</i>     | 892.6 | 821.4* | 91  | 31 | 12 |
|                  |                 |       | 839.5  |     | 37 | 12 |
|                  | <i>PTX6</i>     | 906.6 | 871.6* | 91  | 31 | 12 |
|                  |                 |       | 853.6  |     | 37 | 12 |
| ESI <sup>+</sup> | <i>BTX1</i>     | 867.6 | 849.5* | 151 | 21 | 22 |
|                  |                 |       | 831.5  |     | 25 | 24 |
|                  |                 |       | 813.6  |     | 27 | 20 |
|                  | <i>BTX2</i>     | 895.6 | 877.5* | 161 | 23 | 24 |
|                  |                 |       | 859.6  |     | 29 | 24 |
|                  |                 |       | 455.4  |     | 39 | 12 |
|                  | <i>BTX3</i>     | 897.6 | 725.4* | 151 | 29 | 18 |
|                  |                 |       | 825.4  |     | 17 | 24 |
|                  |                 |       | 807.5  |     | 19 | 24 |
|                  | <i>BTX-B5</i>   | 911.6 | 893.6* | 141 | 25 | 14 |
|                  |                 |       | 875.6  |     | 27 | 14 |
|                  |                 |       | 431.1  |     | 37 | 24 |
|                  | <i>BTX6</i>     | 911.6 | 893.6* | 120 | 30 | 20 |
|                  |                 |       | 875.6  |     | 35 | 20 |
|                  | <i>BTX7</i>     | 869.4 | 779.4* | 120 | 25 | 20 |
|                  |                 |       | 151.2  |     | 45 | 20 |
|                  | <i>BTX9</i>     | 899.4 | 863.5* | 120 | 35 | 20 |
|                  |                 |       | 157.1  |     | 45 | 20 |
|                  | <i>Brevenal</i> | 657.4 | 639.3* | 120 | 35 | 20 |
|                  |                 |       | 579.3  |     | 35 | 20 |
|                  |                 |       | 267.2  |     | 35 | 20 |

\*transition used for quantification
